1 **Correlation of invitro susceptibility based on MICs and SQLE mutations with clinical**  
2 **response to terbinafine in patients with tinea corporis/cruris**

3

4 Ananta Khurana,<sup>a</sup> Aradhana Masih<sup>b</sup>, Anuradha Chowdhary,<sup>b</sup> Kabir Sardana,<sup>a</sup> Sagar Borker,<sup>c</sup>  
5 Aastha Gupta,<sup>a</sup> R K Gautam,<sup>a</sup> P K Sharma,<sup>a</sup> Dhruv Jain<sup>d</sup>

6

7 <sup>a</sup> Department of Dermatology, Dr Ram Manohar Lohia Hospital and Postgraduate Institute of  
8 Medical Education and Research, New Delhi, India

9 <sup>b</sup> Department of Medical Mycology, Vallabhbhai Patel Chest Institute, University of Delhi,  
10 Delhi, India

11 <sup>c</sup> Department of Community Medicine, Dr Ram Manohar Lohia Hospital and Postgraduate  
12 Institute of Medical Education and Research, New Delhi, India

13 <sup>d</sup> People's College of Medical Sciences and Research Centre  
14 Bhopal, Madhya Pradesh, India

15

16 Running head: Terbinafine in-vivo correlation of mycology data

17

18 Address correspondence to Ananta Khurana, [drananta2014@gmail.com](mailto:drananta2014@gmail.com) and Anuradha  
19 Chowdhary, [chowdhary.anuradha@gmail.com](mailto:chowdhary.anuradha@gmail.com)

20

21

22

23

24 **ABSTRACT**

25 Recalcitrant dermatophytoses are on the rise and recent publications have documented high  
26 minimum inhibitory concentrations (MICs) to TRB and squalene epoxidase (SQLE) mutations.  
27 However, literature correlating the laboratory the data with clinical response is lacking.  
28 This study was conducted to study the clinico-mycological profile of tinea corporis and cruris,  
29 including antifungal susceptibility testing (AFST) and SQLE mutation analysis and correlate  
30 these with clinical response to TRB. Skin scrapings of patients with tinea corporis with/without  
31 tinea cruris were subjected to species identification, AFST and SQLE gene analysis (on 15  
32 isolates). KOH confirmed cases were started on TRB 250mg once a day (OD). If >50% clinical  
33 clearance was achieved by 3 weeks; the same dose was continued.(Group 1). If clinical clearance  
34 at 3 weeks was <50%, the dose was increased to 250mg twice a day (BD) (Group 2). If the  
35 response still remained below 50% after 3 weeks of BD, the patients were treated with  
36 itraconazole (ITR)(Group 3). *Trichophyton interdigitale* was confirmed on all 64 isolates  
37 obtained on culture. Forty four (68.7%) isolates had high ( $\geq 1$   $\mu\text{g/ml}$ ) MICs to TRB. Six isolates  
38 were found to have aminoacid substitution Leu393Phe in SQLE protein, while one had the  
39 substitution Phe397Leu. The difference in modal MICs to TRB between the 3 clinical response  
40 groups (1.5157 $\mu\text{g/ml}$ , 5.0396  $\mu\text{g/ml}$  and 20.1587 $\mu\text{g/ml}$  respectively for group 1,2 and 3) was  
41 highly significant. Clinical response was achieved in 68% of those resistant by MIC data, and  
42 42.8% of SQLE mutation harboring isolates, by increasing drug (TRB) exposure.  
43 We infer that TRB resistance in dermatophytes has reached alarming proportions in our patients.  
44 Though improved outcomes were achieved with higher drug exposure, with the high failure rate  
45 seen in the study, the case for shifting to another class of antifungals as first line agent against  
46 dermatophytoses is strong.

47 **INTRODUCTION**

48 Dermatophytoses of skin have been successfully managed with terbinafine (TRB) in the past.  
49 The standard recommendation for tinea corporis/cruris has been TRB 250mg OD for 2-3 weeks;  
50 and in fact even lesser treatment durations have been reported to be successful. (1-3) Of late  
51 though, there has been an upsurge in difficult to treat dermatophytoses and declining responses  
52 to TRB have been on record.(4-7) High minimum inhibitory concentrations (MICs) and  
53 mutations in the target enzyme SQLE have been demonstrated in a few recent reports and the use  
54 of higher TRB dosages is becoming common.(6,8-13) However, clinical breakpoints have not  
55 been defined for TRB in dermatophytoses and the in vitro data cannot be directly applied to  
56 clinical situations.

57 With this work, we aimed to study the clinico-mycological profile of our patients with  
58 corporis/cruris and correlate the clinical response achieved with the standard treatment and  
59 higher dose/durations of TRB with the MICs obtained in laboratory and with target gene (SQLE)  
60 mutations. We also analysed the response of TRB failures to ITR.

61 **PATIENTS AND METHODS (11)**

62 The study was approved by the institutional ethics committee and registered with the clinical  
63 trials registry of India (CTRI). The presented patients were recruited between July 2016 to  
64 December 2017. Eighty five consecutive patients of tinea corporis, with or without tinea cruris,  
65 presenting to the dermatology out patients department of Dr Ram Manohar Lohia hospital were  
66 included after obtaining an informed consent. Those with co-existent tinea manuum/pedis/capitis  
67 or tinea unguium were excluded. Diagnosis was made on clinical examination and confirmed by  
68 KOH microscopy. The included patients had at least 5 lesions over the glabrous skin and/or large  
69 lesion/s covering significant body surface area, and judged by the primary investigator (AK) as

70 requiring systemic treatment. Patients who had used any systemic anti-fungal in the preceding 4  
71 weeks or used any topical antifungal or steroid in the preceding 2 weeks were excluded. Pregnant  
72 or lactating women and children less than 12 years of age and/or weighing less than 40 kg were  
73 also excluded. A detailed history of disease onset, duration, course, family history and previous  
74 treatments was taken followed by examination of the entire skin surface to look for lesions.  
75 Photographs (with Canon Powershot G12) were taken for documentation and comparison of  
76 treatment response. The scales collected were transported to the Medical Mycology laboratory of  
77 Vallabhbhai Patel Chest Institute, Delhi, in a thick dry sheet of paper. Treatment was started after  
78 sending the samples and with KOH confirmation. Complete cure was defined as complete  
79 clinical clearance along with a negative KOH from the site of initial sampling.

80 The patients were started on terbinafine in a dosage of 250 mg OD and asked to follow up 3  
81 weekly. The treatment response was judged by the primary investigator at each visit by clinical  
82 examination (based on extent of lesions, erythema and scaling) and comparison with previous  
83 photographs. If the response to this regimen was greater than 50% at the 3 week follow up, the  
84 same dose was continued till complete cure (Group 1). If the clinical response after 3 weeks was  
85 less than 50% or if new lesions appeared during this time, the patient was shifted to terbinafine  
86 250mg BD, and reassessed after another 3 weeks. If >50% clinical clearance was achieved by  
87 this point, the same regimen was continued till complete cure (Group 2). However, if the  
88 response still remained below 50%/new lesions appeared, the patient was shifted to ITR given in  
89 a dose of 100mg BD and treated till complete cure. (Group 3) We chose a cutoff of 3 weeks as  
90 this has been the standard recommended treatment duration for tinea corporis/cruris.(1,14) The  
91 patients were counseled on general hygiene measures and ways to reduce transmission among  
92 family members. No topical antifungal was given to avoid additive effect and patients were

93 instructed to use only emollients topically. Antihistamines were prescribed as per the patient's  
94 symptoms. Patients were asked of adverse effects pertaining to TRB at each visit and liver  
95 function tests were performed periodically.

96 Skin scrapings were processed for direct microscopic examination by 10% potassium hydroxide  
97 (KOH)/Blankophor. The specimens were inoculated on two sets each of Sabourauds dextrose  
98 agar (SDA) containing gentamicin and chloramphenicol and the other containing cycloheximide  
99 (0.05%) incubated at 28°C for 2 weeks. Preliminary macroscopic phenotypic identification was  
100 done on potato dextrose agar (PDA) incubated at 28°C for 14 days. Slide cultures prepared on  
101 PDA and mounted in lactophenol cotton blue were examined microscopically.

102 Molecular identification of isolates was performed by sequencing the internal transcribed spacer  
103 (ITS) region of the small subunit ribosomal deoxyribonucleic acid (rDNA). ITS sequences were  
104 subjected to BLAST searches at GenBank (<http://www.ncbi.nlm.nih.gov/BLAST/Blast.cgi>).  
105 Sequence-based species identification was defined by  $\geq 99\%$  sequence similarity with  $\geq 99\%$   
106 query coverage. The neotype and type strains of *Trichophyton* species (*T. interdigitale*, CBS  
107 428.63NT; *T. mentagrophytes*, CBS 318.56NT146; *T. rubrum*, CBS 392.58NT; *T. tonsurans*,  
108 CBS 496.48NT and *T. violaceum*, CBS374.92T147) were retrieved from GenBank and included  
109 for phylogenetic analysis.

110 Antifungal susceptibility testing (AFST) was carried out using the Clinical and Laboratory  
111 Standards Institute broth microdilution method (CLSI-BMD), using the M38-A2 guidelines.  
112 Eleven systemically/topically used antifungals were tested including terbinafine (TRB,  
113 Synergene India, Hyderabad, India.), itraconazole (ITR; Lee Pharma, Hyderabad, India),  
114 voriconazole (VRC; Pfizer Central Research, Sandwich, Kent, United Kingdom), fluconazole  
115 (FLU; Sigma-Aldrich, Germany), sertaconazole (SER; Optimus, Hyderabad, India), luliconazole

116 (LUZ, Sun pharmaceuticals, Baddi, HP, India), clotrimazole (CLT; Sigma-Aldrich), miconazole  
117 (MCZ; Sigma-Aldrich), ketoconazole (KTC; Sigma-Aldrich), amphotericin B (AMB; Sigma-  
118 Aldrich) and griseofulvin (GRE; Sigma-Aldrich). CLSI recommended control strains of *Candida*  
119 *krusei* ATCC6258 and *Candida parapsilosis* ATCC22019 were included for every batch of  
120 isolates tested each day. Reference strains of *T. interdigitale* (ATCC MYA-4439) and *T. rubrum*  
121 (CBS 592.68) were also included in susceptibility testing. Minimum inhibitory concentration  
122 endpoints for all the drugs were defined as the lowest concentration that produced complete  
123 inhibition of growth as read visually at 72h.

124 The amplification primers for *SQLE* gene, as described previously were used.<sup>10</sup> PCR was carried  
125 out in a 50 µL reaction volume and the conditions included initial denaturation for 5 minutes at  
126 95°C followed by 34 cycles of 30 seconds at 95°C, 30 seconds at 60°C and 180 seconds at 72°C.  
127 DNA sequencing was performed using the PCR primers at 2.5 mmol/L concentration. All  
128 sequencing reactions were carried out in a 10 µL reaction volume using BigDye Terminator Kit  
129 v3.1 (Applied Biosystems, Foster City, CA, USA) according to the  
130 manufacturer's recommendations and analysed on an ABI3130xL Genetic Analyzer (Applied  
131 Biosystems). The amino acid sequence of SQLEp of all the investigated *T. interdigitale* in the  
132 present study was compared with reference sequence of *T. interdigitale* (GenBank accession  
133 number EZF33561).

134 Statistical analysis was done on SPSS software version 21. One way ANOVA was used to  
135 compare the geometric mean (GM) MICs between the 3 treatment response groups. Chi square  
136 test was used to compare the treatment response with demographic data.

## 137 **RESULTS**

138 A total of 85 patients were included. Of these, 64 samples (75.3%) could be grown on culture  
139 and were taken up for further analysis. Out of these 64 culture positive patients, there were 44  
140 males and 20 females. Ages of patients ranged from 14 to 71 years, with a mean age of 34.9  
141 years. Disease duration ranged between 3 weeks to 5 years, with an average duration of 8.8  
142 months. Thirty five (54.6%) patients had a positive family history of dermatophytic infections,  
143 either at present or in recent past. Interestingly, 45 patients gave a history of sharing of towels  
144 between family members, bringing out the importance of fomite transmission in households.  
145 Only 2 had pets at home and those were apparently uninfected as per the patients' account. Eight  
146 were involved in regular outdoor sports activities and 37 gave history of prolonged working in  
147 hot and humid conditions, either at home or as a part of their vocation.

148 Most patients (51) gave a visual analogue score (VAS) between 8 to 10 for associated pruritus.  
149 Forty five (70.3%) patients had a history of application of topical steroid creams, either plain  
150 steroid or as a combination with antifungals. The most commonly used topical steroid was  
151 clobetasol (27) followed by betamethasone (17), beclomethasone (5), fluticasone (2) and  
152 mometasone (2). Seven had used more than one class of topical steroid. Most (32; 71.1%) had  
153 procured these over the counter from pharmacists without a prescription, while the rest (13,  
154 28.8%) were prescribed by general practitioners. Nine had apparent signs of topical steroid abuse  
155 in the form of striae, skin thinning and depigmentation. Three of the patients were diabetics on  
156 treatment, while one each had coronary artery disease and iron deficiency anemia.

157 Most patients (30; 46.8%) had 5-10 lesions at presentation, while 16 (25%) had 10-20, 13  
158 (20.3%) had more than 20 and 5(7.8%) had 5 or less lesions. Thirty eight (59.3%) had large  
159 confluent lesions covering extensive areas. Associated inflammation on clinical examination was

160 moderate in most (34;53.1%) cases, mild in 20 (31.25%) and severe with pustulation in 3 (4.6%).  
161 Seven (10.9%) had mixed picture with varying degrees of inflammation at different body sites.  
162 *Trichophyton interdigitale* was isolated from all 64 patients. The MICs for terbinafine,  
163 itraconazole, fluconazole, voriconazole, ketoconazole, amphotericin B, griseofulvin, miconazole,  
164 clotrimazole, luliconazole and sertaconazole are tabulated in Table 1. Luliconazole had lowest  
165 MICs (MIC<sub>50</sub> 0.0007µg/ml) while MICs for fluconazole were consistently high (MIC<sub>50</sub>  
166 32µg/ml). Forty four(68.75%) isolates had high MICs against TRB (MIC ≥1 µg/ml) and 23  
167 isolates (35.9%) had extremely high MICs of ≥32µg/ml. Nineteen (29.6%) isolates had MIC of  
168 0.5µg/ml while only 1 had MIC of 0.25µg/ml, the lowest recorded in our patients.  
169 Among the culture positive patients, complete follow up data was available for 30 patients and  
170 these were further included for the clinico-mycological correlation. (Table 2) Fifteen (50%) out  
171 of these responded to prolonged duration of OD TRB, given beyond 3 weeks in all but 2 patients.  
172 The mean duration of response in this group was 39.46±13.12 days (range 21-66 days). Out of  
173 these 15, 8 had MIC of 1µg/ml, 2 had MIC of 0.5 µg/ml, 1 each had MIC of 0.25µg/ml,2µg/ml  
174 and 4µg/ml and 2 had MIC of ≥32µg/ml. The GM MICs to TRB in this group was 1.515µg/ml.  
175 Only one patient in this group had history of previous terbinafine exposure, while 10 (66.67%)  
176 had applied topical steroids over their lesions previously.  
177 The other 15 patients did not show a clinically relevant response (>50% clearance) to OD TRB  
178 till 3 weeks and were shifted to BD dosing. Six of these showed >50% clearance after 3 weeks of  
179 updosing and were continued on this dose till complete cure. The TRB MIC distribution in this  
180 group was 1µg/ml in 2, ≥32µg/ml in 3 patients and 0.5µg/ml in 1. The GM MIC for the group  
181 was 5.039µg/ml and average duration of treatment (including OD and BD treatment) was

182 55.66±20.48 days (range 42-86 days). Only one patient in this group had used terbinafine  
183 previously, while 5 had applied topical steroids previously.

184 Finally, 9 patients did not achieve 50% clinical clearance even after 6 weeks of TRB (3 weeks of  
185 OD and 3 weeks of BD) and were treated with itraconazole(ITR) 100 mg BD for duration  
186 ranging from 21 to 51 days (mean 31.88±3.64 days). Eight of these had TRB MICs of  $\geq 32\mu\text{g/ml}$ ,  
187 while one had MIC of  $0.5\mu\text{g/ml}$ . The GM MIC to TRB was  $20.158\mu\text{g/ml}$ . Seven of these had  
188 been treated with TRB previously (2 with oral TRB, 3 with topical TRB and 2 with both oral and  
189 topical TRB) and 7 had applied topical steroids previously. MICs to ITR in the 9 patients ranged  
190 from 0.125 to  $1\mu\text{g/ml}$ , with GM MIC of  $0.314\mu\text{g/ml}$ .

191 The difference between the GM MICs between the three groups was highly significant  
192 ( $p=0.004$ ), as was the difference between GM MICs of combined group 1 and 2 (patients who  
193 achieved cured with TRB, with any dose/duration;  $2.136\mu\text{g/ml}$ ) and group 3 (who were not cured  
194 even with higher drug exposure;  $20.159\mu\text{g/ml}$ ) ( $p=0.004$ ). However, we did not find a statistically  
195 significant correlation between individual MICs or susceptibility based on MIC ( $\text{MIC} \geq 1\mu\text{g/ml}$   
196 or  $< 1\mu\text{g/ml}$ ) with cure achieved with TRB (with standard or higher drug exposure). We also did  
197 not find any significant association between cure achieved with TRB or MIC values to TRB with  
198 family history of tinea, duration of the disease, past history of topical steroid use or history of  
199 episodes of tinea in recent past.

200 Among those infected with TRB susceptible organisms ( $\text{MIC} < 1\mu\text{g/ml}$ ), 80% achieved cure,  
201 while 68% of those infected with resistant organisms achieved cure, either by standard  
202 dose/duration of treatment or by up dosing/increasing treatment duration. (Table 3)The odds of  
203 achieving cure with TRB, when infected with a susceptible organism were 1.88 times the odds of  
204 achieving cure when the organism was TRB resistant. Further, of the 4 susceptible TRB

205 responsive patients, one achieved cure with standard dose and duration of TRB, 2 to longer  
206 duration of the standard dose and 1 after up dosing to BD. Of those infected with resistant  
207 organism, most of those who responded (11), responded with an increase in the treatment  
208 duration of OD dose, while 5 achieved cure with up dosing.

209 Squalene epoxidase (SQLE) gene mutation analysis was done in a total of 15 (out of 64) isolates.  
210 Out of these, 7 harbored mutations leading to single amino acid substitution in the SQLE protein.  
211 (TABLE 2) The MICs in mutated isolates were 4 µg/ml (1 isolate) and >32 µg/ml (6 isolates)The  
212 8 isolates which did not demonstrate mutations had MICs of 0.5 µg/ml (5) and 1 µg/ml (3) .Six  
213 of the mutation harboring isolates had the aminoacid substitution Leu393Phe in SQLE protein  
214 and one had the substitution Phe397Leu. Four of these belonged to treatment group 3, 1 to group  
215 2 and 2 to group 1. Four (57.1%) of these patients had previous exposure to TRB (oral/topical).  
216 Three patients (42.8%) with SQLE mutations responded to higher dose/longer duration of  
217 treatment, while 4 (57.14%) did not respond to the drug even after increasing the drug exposure.

## 218 **DISCUSSION**

219 A predominant finding of our study is the very high level (68.7%) of TER resistance in our  
220 isolates. Secondly, correlation of the clinical response to TRB with mycological parameters of  
221 MIC and SQLE gene mutations revealed that increasing TRB drug exposure is able to achieve  
222 cure in about 68% of isolates resistant by MIC data and about 57% of confirmed SQLE mutated  
223 isolates' infections. The data we have presented here forms the basis of establishing clinical  
224 breakpoints for a drug-species pair, although larger patient numbers and intricate tissue level PK  
225 data would also be essential for the same.

226 Dermatophytoses present a huge economic burden on the medical establishments all over the  
227 world, with an estimated worldwide prevalence of 20-25%.(15) However, the drug classes

228 available against dermatophytes are limited in their spectrum of action, largely targeting the  
229 ergosterol biosynthetic pathway. Terbinafine has been the drug of choice and has been in use for  
230 almost three decades now. However, there are still lacunae in our knowledge regarding some  
231 aspects of its use for dermatophytoses mainly relating to the pharmacokinetic/pharmacodynamic  
232 (PK/PD) parameter best predictive of response and the clinical breakpoints.

233 It has been previously demonstrated in in-vitro trials that the frequency of naturally occurring  
234 mutants with resistance to TRB and of development of resistance during prolonged exposure to  
235 the drug are both very low ( $\sim 10^{-9}$ ), compatible with the reported mechanism of single nonsilent  
236 nucleotide substitution in gene encoding SQLE protein.(16-17)Indeed, prior to 2017, there had  
237 been only 2 documented cases of TRB resistance in dermatophytes.(18-19) However, the  
238 scenario has been increasingly reported over the last year. (Table 4) Apart from SQLE mutations,  
239 there are isolated reports of TRB resistance mediated by mutations in *salA* gene,  
240 encoding salicylate 1-monooxygenase and genes encoding ABC transporter proteins.(21-22)

241 An important lacuna in literature related to the topic at this point of time is the lack of  
242 prospectively acquired clinical correlation data. As in vitro data may not be directly  
243 extrapolatable to clinical situations, the clinical correlation in individual cases becomes an  
244 important domain to explore. Further, it is also important to assess host factors/trends which may  
245 possibly be contributing to development of resistance to TRB, considered an unusual event so  
246 far.

247 A striking finding of our study is the complete dominance of *T.interdigitale* as the etiological  
248 agent for tinea corporis/cruris. Literature from most other nations as well as older Indian  
249 literature mostly cites *T.rubrum* as the predominant organism, and *T.interdigitale* has previously  
250 been reported as a prominent species from only a few geographical areas.(23-28) However, few

251 other recent Indian reports have also found *T.interdigitale* in a large percentage of  
252 isolates.(11,12,29) A species shift has been considered as an important factor for the epidemic of  
253 recalcitrant tinea India is facing since few years, although the reasons for it are not yet clear.  
254 Our results also reconfirm the unfortunate trend of high MICs to TRB. In all, 68.75% of the 64  
255 isolates had MICs of  $\geq 1\mu\text{g/ml}$ , with 35.9% having very high MICs of  $>32\mu\text{g/ml}$ . No  
256 epidemiologic cut offs (ECVs) have been established for terbinafine resistance in *T. interdigitale*  
257 by CLSI. We have taken the cutoff as described for *T.rubrum* strains previously.(30)The criteria  
258 of high TRB MICs of  $\geq 1\mu\text{g/ml}$  however needs to be validated for *T.interdigitale* by multi-  
259 centric studies with large number of isolates using the defined reference broth microdilution  
260 method. Fluconazole resistance ( $\text{MIC}\geq 64\mu\text{g/ml}$ ), was seen in 5 (8.9%) isolates.(31)Griseofulvin  
261 has become largely ineffectual for dermatophytoses over years and the same trend was reported  
262 in our study as well, with most isolates showing high MICs (GM MIC of  $3.75\mu\text{g/ml}$ ).(32)The  
263 lowest MICs were seen with luliconazole (GM MIC of  $0.007\mu\text{g/ml}$ ). Voriconazole (GM MIC  
264  $0.285\mu\text{g/ml}$ ), itraconazole (GM MIC  $0.414\mu\text{g/ml}$ ), ketoconazole (GM MIC  $0.878\mu\text{g/ml}$ ) and  
265 amphotericin B (GM MIC  $0.374\mu\text{g/ml}$ ) also demonstrated low MICs. Only 1 isolate was  
266 resistant to itraconazole ( $\text{MIC}\geq 8\mu\text{g/ml}$ ), 1 to voriconazole ( $\text{MIC}\geq 2\mu\text{g/ml}$ ) and 3 to  
267 ketoconazole( $\text{MIC}\geq 8\mu\text{g/ml}$ ).(31) The topicals miconazole and clotrimazole, widely used for  
268 dermatophytoses as OTC as well as prescription drugs, also showed low activity with GM MICs  
269 of  $2.327\mu\text{g/ml}$ . Overall the MICs reported in our study were higher than those previously  
270 reported with dermatophytes for most drugs, though the difference in TRB values was most  
271 striking.(32-35)  
272 It was interesting to note that only two (Patient 3, TRB MIC  $1\mu\text{g/ml}$  and patient 26, TRB MIC  
273  $0.5\mu\text{g/ml}$ ) of the 30 analyzed patients responded to the conventional dose and duration of TRB.

274 The rest in group 1 required much longer courses ranging from 28 to 66 days. Notably, all but 3  
275 of the group 1 patients had MICs of 1µg/ml or more, but responded to longer courses of the drug.  
276 Extrapolating from the data on azoles, it is known that optimizing drug exposures can improve  
277 clinical outcomes in the wake of raised MICs/resistant strains, depending on the variables like  
278 the degree of rise in MICs, resistance mechanism and pharmacokinetic/pharmacodynamics  
279 (PK/PD) properties of the antifungal agent.(36)For drugs used against dermatophytoses, the  
280 levels in tissue (stratum corneum [SC]) are more important than the plasma levels. But, there is  
281 only scant literature on tissue level PK of TRB. From 2 such studies done by Faergemann et al, it  
282 can be interpreted that longer courses lead to higher levels of TRB in the SC. The authors  
283 reported SC levels of 14.4µg/g after administration of TRB 250mg OD for 28 days vs 7.63µg/g  
284 at the end of a 14 day course and 2.52µg/g at the end of a 7 day course of the same dose.(37-38)  
285 The higher levels thus achieved with longer durations may have been able to surmount the higher  
286 MICs in group 1 patients.

287 Further, on up dosing to BD, another 6 patients achieved complete cure. As defined in previously  
288 done PK studies, TRB has a linear PK profile upto750mg of dose, implying that an increase in  
289 dose till this level would increase plasma levels proportionately.(39) And this would in all  
290 likelihood lead to an increased SC level, unless the uptake by skin is saturable, of which there is  
291 no documentation yet to the best of our knowledge. This group benefitted both from an increase  
292 in dose and an increase in duration, possibly achieving higher SC levels than achieved by group  
293 1. Notably, the GM MIC of group 2(5.039µg/ml) was about 5 times higher than that of group1  
294 (1.5157µg/ml). This may explain why the group 2 patients did not respond only with longer  
295 durations of treatment.

296 Finally 9 patients did not achieve 50% clinical clearance even after 6 weeks of TRB (OD for 3  
297 weeks followed by BD for 3 weeks) and were then treated with itraconazole. The GM MIC of  
298 this group was 20.159 $\mu$ g/ml, which was about 20 times that of group 1 and 4 times that of group  
299 2. This demonstrates a trend wherein higher drug exposure surmounts the higher MICs to an  
300 extent, after which the drug fails to work. Whether doses higher than what we used would  
301 improve cure rates further may be an area of further research, though further increases may be  
302 limited by drug toxicity. We did not observe any drug related adverse effects with using longer  
303 durations and higher doses of TRB, although the data may be biased by a small sample size.(40)

304 Analyzing the clinical response data of the 7 patients in whom SQLE mutations were  
305 characterized, 4 of these (57.1%) did not respond to higher drug exposure, while 3 (42.8%) did.  
306 This data, though small, largely supports the 90-60 rule of clinical correlation with invitro  
307 susceptibility testing, wherein about 60% of resistant isolates respond to the drug in vivo.(41)

308 The susceptibility based on MIC data also gives a similar interpretation, wherein 68% of the  
309 isolates with MIC $\geq$ 1  $\mu$ g/ml could be successfully treated with TRB. One of these (patient 3)  
310 responded to the usual dose and duration of TRB, while the other 16 required longer  
311 durations/higher dose. In both the present study and our previous work, SQLE mutations were  
312 noted in isolates with MICs 4 to  $\geq$ 32  $\mu$ g/mL and wild type genotype (i.e., no SQLE mutation)  
313 was noted in *T. interdigitale* isolates with MICs  $\leq$ 2  $\mu$ g/mL This may imply that SQLE mutations  
314 lead to a high level resistance in *T. interdigitale* and alternate mechanisms may be working in  
315 resistant isolates with MICs <4  $\mu$ g/mL.(11)

316 We couldnot identify any host factors predisposing to TRB resistance. Topical steroid use may  
317 enhance development of resistance to antifungals being used simultaneously, by activating  
318 fungal metabolism and by a cell membrane protective activity. However, we did not find a

319 statistically significant correlation between topical steroid use and clinical response to TRB. One  
320 possible reason for this could have been the widely prevalent use of topical steroids in our  
321 patients which precluded formation of comparable groups. Indeed, 21 of the 30 analyzed patients  
322 had used topical steroids before, while only 9 had not. Prior TRB exposure also did not yield any  
323 predictable results although on general observation of the trend among the 3 treatment groups,  
324 we observed previous TRB exposure to be most prominent in group 3 (77.78% in group 3 vs  
325 6.67% in group 1 and 16.67% in group 2). Age, family history of tinea and history of recurrent  
326 tinea in the past also had no significant correlation with TRB resistance (based on MIC values).  
327 Whether the resistance we have seen was primary or acquired cannot be commented upon a  
328 single time assessment. But it was an interesting finding that most (16/17; 94.11%) of those who  
329 were resistant and yet responded to TRB had not been exposed to TRB before, while most of  
330 those who were resistant and did not respond to TRB (7/8; 87.5%) had been exposed to TRB  
331 before.

332 All 9 patients who failed TRB were successfully treated with ITR. These all were sensitive to  
333 ITR based on MIC data as well. Overall too, ITR resistance was seen in only one of the 64  
334 isolates. Thus, ITR sensitivity seems to be preserved in dermatophytes so far, and ITR may  
335 become a frontline drug for dermatophytoses with rising failures being seen with TRB.

336 In the end, we would like to highlight that resistance to TRB has reached a worrisome level in  
337 isolates from dermatophyte infections in our patients. Increasing drug exposure by means of  
338 higher dose/duration can surmount this to some degree, but the high failure rate still (30%)  
339 cannot be ignored. Although localized to a few geographical locales so far, it may not be long  
340 before the resistance spreads to other regions and it would be desirable to preplan strategies to

341 combat the same. A rethink on the treatment order and development of newer drug classes  
342 against dermatophytes with novel mechanisms of action is due.

### 343 REFERENCES

- 344 1. McClellan KJ, Wiseman LR, Markham A. 1999. Terbinafine. An update of its use  
345 in superficial mycoses. *Drugs* 58:179-202.
- 346 2. Hay RJ, Ashbee HR. Fungal Infections, p 32.1-32.96. In: Griffiths CEM, Barker J,  
347 Bleiker T, Chalmers R, Creamer D (ed), *Rook's Textbook of Dermatology*, 9<sup>th</sup>edn.  
348 Wiley-Blackwell, United Kingdom.
- 349 3. Farag A, Taha M, Halim S. 1994. One week therapy with oral terbinafine in cases of  
350 tinea cruris/corporis. *Br J Dermatol* 131:684-6.
- 351 4. Bishnoi A, Vinay K, Dogra S. 2018. Emergence of recalcitrant dermatophytosis in India.  
352 *Lancet Infect Dis* 18:250-1.
- 353 5. Narang T, Mahajan R, Dogra S. 2017. Dermatophytosis: Fighting the challenge:  
354 Conference proceedings and learning points. September 2-3, 2017, PGIMER,  
355 Chandigarh, India. *Indian Dermatol Online J* 8:527-33
- 356 6. Babu PR, Pravin AJS, Deshmukh G Dhoot D, Samant A, Kotak B. 2017. Efficacy and  
357 Safety of Terbinafine 500 mg Once Daily in Patients with Dermatophytosis. *Indian J*  
358 *Dermatol* 62:395-399
- 359 7. Majid I, Sheikh G, Kanth F, Hakak R. 2016. Relapse after oral terbinafine therapy in  
360 dermatophytosis: A clinical and mycological study. *Indian J Dermatol* 61:529-33.
- 361 8. Schøsler L, Andersen LK, Arendrup MC, Sommerlund M. 2018.  
362 Recurrent terbinafine resistant *Trichophyton rubrum* infection in a child with congenital  
363 ichthyosis. *PediatrDermatol* 35:259-260.

- 364 9. Digby W, Sanna S, Hald M, [Hjort SV](#), [Kofoed K](#).. 2017. Darier disease complicated by  
365 terbinafine-resistant *Trichophyton rubrum*: a case report. *ActaDermVenereol* 97:139-40.
- 366 10. Yamada T, Maeda M, Alshahni MM [Tanaka R](#), [Yaguchi T](#), [Bontems O](#), [Salamini K](#), [Fratti](#)  
367 [M](#), [Monod M](#). 2017. Terbinafine resistance of *Trichophyton* clinical isolates caused by  
368 specific point mutations in the squalene epoxidase gene. *Antimicrob Agents Chemother*  
369 61:e00115-17.
- 370 11. Singh A, Masih A, Khurana A, [Singh PK](#), [Gupta M](#), [Hagen F](#), [Meis JF](#), Chowdhary A.  
371 2018. High terbinafine resistance in *Trichophyton interdigitale* isolates in Delhi, India  
372 harbouring mutations in the Squalene epoxidase (SQLE) gene. *Mycoses* Mar 25. doi:  
373 10.1111/myc.12772.
- 374 12. Rudramurthy SM, Shankarnarayan SA, Dogra, [Shaw D](#), [Mushtaq K](#), [Paul RA](#), [Narang](#)  
375 [T](#), [Chakrabarti A](#). 2018. Mutation in the Squalene epoxidase gene of *Trichophyton*  
376 *interdigitale* and *Trichophyton rubrum* associated with allylamine resistance.  
377 *Antimicrob Agents Chemother* Mar 12. pii: AAC.02522-17. doi: 10.1128/AAC.02522-17
- 378 13. Sardana K, Gupta A. 2017. Rational for Drug Dosimetry and Duration of Terbinafine in  
379 the Context of Recalcitrant Dermatophytosis: Is 500 mg Better than 250 mg OD or  
380 BD? *Indian J Dermatol* 62:665-667
- 381 14. Sahoo AK, Mahajan R. 2016. Management of tinea corporis, tinea cruris, and tinea pedis:  
382 A comprehensive review. *Indian Dermatol Online J* 7:77-86.
- 383 15. Havlickova B, Czaika VA, Friedrich M. Epidemiological trends in skin mycoses  
384 worldwide. *Mycoses* 2008;51:2-15.

- 385 16. Ghelardi E, Celandroni F, Gueye SA, Salveti S, Senesi S, Bulgheroni A, Mailland F.  
386 2014. Potential of Ergosterol synthesis inhibitors to cause resistance or cross-resistance in  
387 *Trichophyton rubrum*. *Antimicrob Agents Chemother* 58:2825-9.
- 388 17. Osborne CS, Hofbauer B, Favre B, Ryder NS. 2003. In vitro analysis of the ability of  
389 *Trichophyton rubrum* to become resistant to terbinafine. *Antimicrob Agents*  
390 *Chemother*47:3634-6.
- 391 18. Osborne CS, Leitner I, Hofbauer B, Fielding CA, Favre B, Ryder NS. 2006. Biological,  
392 biochemical, and molecular characterization of a new clinical *Trichophyton rubrum*  
393 isolate resistant to terbinafine. *Antimicrob Agents Chemother* 50:2234-6.
- 394 19. Mukherjee PK, Leidich SD, Isham N, Isham N, Leitner I, Ryder NS, Ghannoum MA.  
395 2003. Clinical *Trichophyton rubrum* strain exhibiting primary resistance to terbinafine.  
396 *Antimicrob Agents Chemother* 47:82-6.
- 397 20. Osborne CS, Leitner I, Favre B, Ryder NS. 2005. Amino acid substitution in  
398 *Trichophyton rubrum* squalene epoxidase associated with resistance to terbinafine.  
399 *Antimicrob Agents Chemother* 49:2840-4.
- 400 21. Santos HL, Lang EA, Segato F, Rossi A, Martinez-Rossi NM. 2018. Terbinafine  
401 resistance conferred by multiple copies of the salicylate 1-monooxygenase gene in  
402 *Trichophyton rubrum*. *Med Mycol* 56:378-381.
- 403 22. Kano R, Hsiao YH, Han HS, Chen C, Hasegawa A, Kamata H. 2018.  
404 Resistance Mechanism in a Terbinafine-Resistant Strain of *Microsporum canis*.  
405 *Mycopathologia*. Jan 16. doi: 10.1007/s11046-018-0242-0.
- 406 23. Surendran KAK, Bhat RM, Bloor R, Nandakishore B, Sukumar D. 2014. Clinical and  
407 Mycological Study of Dermatophytic Infections. *Indian J Dermatol* 59: 262-267.

- 408 24. Bhagra S, Ganju S, Kanga A, Nandakishore B, Sukumar D. 2014. Mycological pattern of  
409 dermatophytosis in and around Shimla hills. *Indian J Dermatol* 59:268-70.
- 410 25. Poluri LV, Indugula JP, Kondapaneni SL. 2015. Clinicomycological study of  
411 dermatophytosis in South India. *J Lab Physicians* 7:84-89.
- 412 26. Wakasa A, Anzawa K, Kawasaki M, Mochizuki T. 2010. Molecular typing of  
413 *Trichophyton mentagrophytes* var. *interdigitale* isolated in a university hospital in Japan  
414 based on the non-transcribed spacer region of the ribosomal RNA gene.  
415 *J Dermatol* 37:431-40.
- 416 27. Fallahi AA, Rezaei-Matchkolaei A, Rezaei S. 2017. Epidemiological status of  
417 dermatophytosis in Guilan, north of Iran. *Curr Med Mycol* 3:20-24.
- 418 28. Watanabe S, Anzawa K, Mochizuki T. 2017. High prevalence of superficial white  
419 onychomycosis by *Trichophyton interdigitale* in a Japanese nursing home with a geriatric  
420 hospital. *Mycoses* 60:634-637.
- 421 29. Dabas Y, Xess I, Singh G, Pandey M, Meena S. 2017. Molecular identification and  
422 antifungal susceptibility patterns of clinical dermatophytes following CLSI and EUCAST  
423 guidelines. *J Fungi(Basel)* 3:17.
- 424 30. Favre B, Ghannoum MA, Ryder NS. 2004. Biochemical characterization of terbinafine-  
425 resistant *Trichophyton rubrum* isolates. *Med Mycol* 42:525–529
- 426 31. Ghannoum M. 2016. Azole Resistance in Dermatophytes: Prevalence and Mechanism of  
427 Action. *J Am Podiatr Med Assoc.* 106:79-86.
- 428 32. Mahajan S, Tilak R, Kaushal SK, Mishra RN, Pandey SS. 2017. Clinico-mycological  
429 study of dermatophytic infections and their sensitivity to antifungal drugs in a tertiary  
430 care center. *Indian J DermatolVenereolLeprol* 83:436-440.

- 431 33. Adimi P, Hashemi SJ, Mahmoudi M, Mirhendi H, Shidfar MR, Emmami M, Rezaei-  
432 Matehkolaei A, Gramishoar M, Kordbacheh P. 2013. In-vitro activity of 10 antifungal  
433 agents against 320 dermatophyte strains using microdilution method in Tehran. Iran J  
434 Pharm Res 12:537-45.
- 435 34. Silva LB, Oliveira DB, Silva BV, de Souza RA, da Silva PR, Ferreira-Paim K, Andrade-  
436 Silva LE, Silva-Vergara ML, Andrade AA. 2014. Identification and antifungal  
437 susceptibility of fungi isolated from dermatomycoses. J  
438 EurAcadDermatolVenereol 28:633-40.
- 439 35. Sarifakioglu E, Seçkin D, Demirbilek M, Can F. 2007. In vitro antifungal susceptibility  
440 patterns of dermatophyte strains causing tinea unguium. ClinExpDermatol 32:675-9.
- 441 36. Seyedmousavi S, Mouton JW, Melchers WJ, Brüggemann RJ, Verweij PE. 2014.  
442 The role of azoles in the management of azole-resistant aspergillosis: from the bench to  
443 the bedside. Drug Resist Updat. 17:37-50
- 444 37. Faergemann J, Zehender H, Denouël J, Millerioux L. 1993. Levels of terbinafine in  
445 plasma, stratum corneum, dermis-epidermis (without stratum corneum), sebum, hair and  
446 nails during and after 250 mg terbinafine orally once per day for four weeks.  
447 ActaDermVenereol 73:305-9.
- 448 38. Faergemann J, Zehender H, Millerioux L. 1994. Levels of terbinafine in plasma, stratum  
449 corneum, dermis-epidermis (without stratum corneum), sebum, hair and nails during and  
450 after 250 mg terbinafine orally once daily for 7 and 14 days. ClinExpDermatol 19:121-6.
- 451 39. Jensen JC. 1989. Clinical pharmacokinetics of terbinafine (Lamisil).  
452 ClinExpDermatol 14:110-3.

- 453 40. Khurana A, Sardana K, Bhardwaj V. 2018 .Terbinafine induced liver injury may be  
454 asymptomatic: need for regular monitoring. Br J Dermatol. 178:807-8
- 455 41. Rex JH, Pfaller MA. 2002. Has antifungal susceptibility testing come of age? Clin Infect  
456 Dis. 35:982-9.

457  
458  
459  
460  
461  
462  
463  
464  
465  
466  
467  
468  
469  
470  
471  
472  
473  
474  
475  
476  
477  
478  
479  
480  
481

482 **TABLE 1: MICs of the 56 isolates to the 11 antifungals tested**

| <b>Parameter</b>        | <b>TRB</b>           | <b>ITR</b>           | <b>FLU</b>           | <b>VRC</b>           | <b>KTC</b>           | <b>AMB</b>           | <b>GRI</b>           | <b>MCZ</b>           | <b>CLT</b>           | <b>LUZ</b>           | <b>SER</b>           |
|-------------------------|----------------------|----------------------|----------------------|----------------------|----------------------|----------------------|----------------------|----------------------|----------------------|----------------------|----------------------|
| ( $\mu\text{g/ml}$ )    | ( $\mu\text{g/ml}$ ) | ( $\mu\text{g/ml}$ ) | ( $\mu\text{g/ml}$ ) | ( $\mu\text{g/ml}$ ) | ( $\mu\text{g/ml}$ ) | ( $\mu\text{g/ml}$ ) | ( $\mu\text{g/ml}$ ) | ( $\mu\text{g/ml}$ ) | ( $\mu\text{g/ml}$ ) | ( $\mu\text{g/ml}$ ) | ( $\mu\text{g/ml}$ ) |
| <b>GM</b>               | 2.89                 | 0.414                | 16.53                | 0.285                | 0.878                | 0.374                | 3.75                 | 2.327                | 2.327                | 0.007                | 1.176                |
| <b>MIC<sub>50</sub></b> | 1                    | 0.5                  | 32                   | 0.25                 | 1                    | 0.38                 | 4                    | 2                    | 2                    | 0.007                | 1                    |
| <b>MIC<sub>90</sub></b> | 32                   | 1                    | 64                   | 1                    | 2                    | 1                    | 8                    | 4                    | 4                    | 0.015                | 6.4                  |
| <b>RANGE</b>            | 0.25-<br>$\geq 32$   | 0.06-<br>$\geq 16$   | 0.5-<br>$\geq 64$    | 0.06-2               | 0.25-<br>$\geq 32$   | 0.25-<br>1           | 0.5-<br>$\geq 8$     | 0.25-<br>$\geq 16$   | 0.5-8                | 0.0035-<br>0.125     | 0.25-<br>$\geq 16$   |

483 GM: Geometric mean, TRB: Terbinafine, ITR: Itraconazole, FLU: Fluconazole, VRC:

484 Voriconazole, KTC: Ketoconazole, AMB: Amphotericin B, GRIS: Griseofulvin, MCZ:

485 Miconazole, CLT: Clotrimazole, LUZ: Luliconazole, SER: Sertaconazole

486

487

488

489

490

491

492

493

494

495

496 **TABLE 2: Comparison of clinical response and mycological data of 30 patients**

| <b>Patient No</b> | <b>Previous TRB exposure</b> | <b>Previous steroid application</b> | <b>TRB response group</b> | <b>Duration(days) of treatment with TRB (for groups 1,2) /ITR (for group 3)</b> | <b>TRB MIC (µg/ml)</b> | <b>SQLE analysis</b>   |
|-------------------|------------------------------|-------------------------------------|---------------------------|---------------------------------------------------------------------------------|------------------------|------------------------|
| 1                 | -                            | -                                   | 1                         | TRB 35                                                                          | 1                      | Done<br>No<br>mutation |
| 2                 | +O                           | -                                   | 2                         | TRB 86                                                                          | 1                      | Done<br>No<br>mutation |
| 3                 | -                            | +                                   | 1                         | TRB 21                                                                          | 1                      | Not done               |
| 4                 | -                            | +                                   | 2                         | TRB 42                                                                          | 1                      | Not done               |
| 5                 | -                            | -                                   | 1                         | TRB 52                                                                          | 1                      | Not done               |
| 6                 | -                            | +                                   | 1                         | TRB 42                                                                          | 1                      | Done<br>No<br>mutation |
| 7                 | -                            | +                                   | 1                         | TRB 39                                                                          | 1                      | Not done               |
| 8                 | -                            | +                                   | 1                         | TRB 28                                                                          | 1                      | Not done               |
| 9                 | -                            | +                                   | 1                         | TRB 43                                                                          | 1                      | Not done               |
| 10                | -                            | -                                   | 1                         | TRB 66                                                                          | 1                      | Not done               |

|    |    |   |   |        |      |                                |
|----|----|---|---|--------|------|--------------------------------|
| 11 | -  | + | 1 | TRB 35 | 0.25 | Not done                       |
| 12 | -  | + | 1 | TRB 28 | >32  | Done<br>Mutation<br>+<br>F397L |
| 13 | -  | - | 1 | TRB 43 | 32   | Not done                       |
| 14 | -  | + | 1 | TRB 42 | 4    | Done<br>Mutation<br>+<br>F397L |
| 15 | +O | - | 3 | ITR 28 | >32  | Done<br>Mutation<br>+<br>F397L |
| 16 | +T | + | 3 | ITR 21 | >32  | Done<br>Mutation<br>+<br>L393F |
| 17 | -  | + | 2 | TRB 42 | >32  | Done<br>Mutation<br>+<br>F397L |
| 18 | +T | + | 3 | ITR 21 | >32  | Not done                       |

|    |     |   |   |        |     |                                |
|----|-----|---|---|--------|-----|--------------------------------|
| 19 | -   | + | 3 | ITR 36 | 32  | Not done                       |
| 20 | -   | + | 1 | TRB 35 | 2   | Not done                       |
| 21 | +OT | + | 3 | ITR 45 | >32 | Done<br>Mutation<br>+<br>F397L |
| 22 | -   | + | 3 | ITR 51 | >32 | Not done                       |
| 23 | -   | + | 2 | TRB 54 | >32 | Not done                       |
| 24 | -   | + | 2 | TRB 35 | >32 | Not done                       |
| 25 | +T  | + | 3 | ITR 36 | 32  | Done<br>Mutation<br>+<br>F397L |
| 26 | -   | - | 1 | TRB 21 | 0.5 | Done<br>No<br>mutation         |
| 27 | +O  | + | 1 | TRB 62 | 0.5 | Not done                       |
| 28 | +OT | + | 3 | ITR 21 | 0.5 | Not done                       |
| 29 | +O  | - | 3 | ITR 28 | >32 | Not done                       |
| 30 | -   | + | 2 | TRB 75 | 0.5 | Not done                       |

497 TRB: Terbinafine; ITR: Itraconazole; O: Oral TRB, T: Topical TRB

498

499 **TABLE 3: Response to TRB in mycologically susceptible and resistant infections**

|                                         | <b>Organism susceptible<br/>(MIC&lt;1µg/ml); n=5</b> | <b>Organism resistant<br/>(MIC&gt;1 µg/ml),<br/>n=25</b> | <b>Odd's ratio</b> |
|-----------------------------------------|------------------------------------------------------|----------------------------------------------------------|--------------------|
| <b>Cure achieved with<br/>TRB; n=21</b> | 4(80%)                                               | 17 (68%)                                                 | 1.88               |
| <b>Not cured with TRB<br/>N=9</b>       | 1(20%)                                               | 8 (32%)                                                  |                    |

500  
501  
502  
503  
504  
505  
506  
507  
508  
509  
510  
511  
512  
513  
514  
515  
516  
517  
518  
519  
520  
521  
522

523 **TABLE 4: Previous reports of TRB resistance in dermatophytes**

524

| S No | Authors                             | Case setting & MICs                                                                                                              | SQLE mutational analysis                                                            |
|------|-------------------------------------|----------------------------------------------------------------------------------------------------------------------------------|-------------------------------------------------------------------------------------|
| 1    | Mukherjee et al, 2003 <sup>19</sup> | High MICs (>4µg/ml) from <i>T.rubrum</i> isolates obtained from a single onychomycosis patient who failed TRB given for 24 weeks | Single amino acid substitution in SQLE protein (L393F) reported later <sup>20</sup> |
| 2    | Osborne et al, 2006 <sup>18</sup>   | New clinical strain of TRB resistant <i>T.rubrum</i> with an MIC of 64µg/ml                                                      | Documented a single amino acid substitution (F397L) in the SQLE protein             |
| 3    | Schøsler et al <sup>8</sup>         | TRB failure in a child with congenital ichthyosis<br>MIC reported as 4µg/mL                                                      | Mutational analysis not done                                                        |

|   |                                       |                                                                                                                                  |                                                                                                                                                                           |
|---|---------------------------------------|----------------------------------------------------------------------------------------------------------------------------------|---------------------------------------------------------------------------------------------------------------------------------------------------------------------------|
| 4 | Digby et al <sup>9</sup>              | TRB failure in an adult with Darier's disease; MIC >4µg/mL                                                                       | Mutational analysis not done                                                                                                                                              |
| 5 | Yamada et a, 2017 <sup>10</sup>       | Samples collected over a 3 year period from tinea pedis and unguium cases MICs reported for mutated isolates: 0.1 to >12.8µg/ml. | SQLE mutations (leading to aminoacid substitutions at Leu393, Phe397, Phe415 and His440) demonstrated in 17 isolates ( 16 <i>T.rubrum</i> and 1 <i>T. interdigitale</i> ) |
| 6 | Rudramurthy et al, 2018 <sup>12</sup> | Clinical cases of dermatophytoses excluding those with only nail involvement; MICs of mutated isolates: 4-16µg/ml                | Phe397Leu substitution in 4 <i>T.interdigitale</i> and 2 <i>T.rubrum</i> isolates (out of a total of 20 tested)                                                           |
| 7 | Singh et al, 2018 <sup>11</sup>       | Samples (mostly)                                                                                                                 | 20 TRB resistant                                                                                                                                                          |

|  |  |                                                                                                                           |                                                                                          |
|--|--|---------------------------------------------------------------------------------------------------------------------------|------------------------------------------------------------------------------------------|
|  |  | from tinea corporis and cruris patients from 3 centers in Delhi, India. MICs of mutated isolates: 4- $\geq$ 32 $\mu$ g/ml | <i>T.interdigitale</i> isolates (with MICs 4 to $\geq$ 32 $\mu$ g/mL) had SQLE mutations |
|--|--|---------------------------------------------------------------------------------------------------------------------------|------------------------------------------------------------------------------------------|

525
